# Supplementary material for: Fermi level shifts of gold nanospheres on ZnO film upon UV irradiation
Source: Royal Society of Chemistry journal article supplement (doi:10.1039/d3cp02910g), 2023-01-01
Supplement: d3cp02910g1.pdf [file d3cp02910g1.pdf]

## Supplementary Information:

### Fermi level shifts of gold nanospheres on ZnO film upon UV irradiation

Grégory Barbillon<sup>a</sup>

<sup>a</sup> EPF-École d'Ingénieurs, 55 Avenue du Président Wilson, 94230 Cachan, France.  
Corresponding author's email: [gregory.barbillon@epf.fr](mailto:gregory.barbillon@epf.fr)

#### **Fabrication of zinc oxide film and gold nanospheres**

The zinc oxide films were realized by growth on c-plane sapphire substrates by employing the method of pulsed laser deposition from a sintered ZnO target (99.9995% pure) and with a KrF excimer laser. Afterwards, an annealing at 600°C was realized in O<sub>2</sub>. Concerning to the fabrication of gold nanospheres (AuNS), they were produced by using the synthesis of Turkevich, which consists in the addition of a volume of 1 mL of trisodium citrate ( $8.5 \times 10^{-4}$  M) to a boiling aqueous solution of 20 mL of HAuCl<sub>4</sub> with forceful agitation during 30 min. Thus, the mean diameter of obtained gold nanospheres is 30 nm.

#### **Extinction measurements and Irradiation with UV light**

For the extinction measurements, a Labram spectrometer was employed in a standard configuration of transmission with unpolarized white light, and the transmitted light was collected by using a microscope objective ( $\times 10$ ; N.A. = 0.25). Regarding to UV irradiation, an UV quartz pencil lamp ( $\lambda = 254$  nm with nominal output of 4.5 mW/cm<sup>2</sup>) was used at a fixed distance of 2.4 cm above the substrate.

#### **Calculation of total number of electrons $n_e$ in the gold nanospheres**

$$n_e = V \times \rho \quad \text{with} \quad V = V_{sgAuNS} \times N_{AuNS}$$

$\rho$  is the free electron density in gold whose its value is  $5.9 \times 10^{22}$  cm<sup>-3</sup>.

$N_{AuNS}$  is the number of Au nanospheres present in the probed zone of  $30 \times 30 \mu\text{m}^2$  (here  $N_{AuNS} \approx 1800$ ).

$V_{sgAuNS}$  corresponds to the volume of a single Au nanosphere equal to  $\frac{4}{3}\pi R^3$  where  $R$  is the Au sphere radius (here 15 nm).

$$n_e = V_{sgAuNS} \times N_{AuNS} \times \rho = 1.41 \times 10^{-17} \times 1800 \times 5.9 \times 10^{22} = 1.5 \times 10^9$$

Thus, the total number of electrons  $n_e$  in the gold nanospheres is worth  $1.5 \times 10^9$ .
